# Supplementary material for: Molecular Cloning and Gene Expression of Type I Suppressor of Cytokine Signaling 6 and 7 (SOCS6 and SOCS7) in White Leg Shrimps (<em>Litopenaeus vannamei</em>)
Source: Preprints.org preprint supplement (doi:10.20944/preprints202307.2067.v1), 2023-07-31
Supplement: Supplementary file 1 [file supplementary]

# Supplementary materials

## Molecular cloning and gene expression of Type I suppressor of cytokine signaling 6 and 7 (SOCS6 and SOCS7) in white leg shrimps (*Litopenaeus vannamei*)

Gunasekara CWR, Madhuranga WSP, Jiye Lee, and Chan-Hee Kim\*

Division of Fisheries Life Science, Pukyong National University, Busan 48513, Korea

\*Correspondence: chkim@pknu.ac.kr; Tel.: +82-51-629-5917

```

ATGATGAAAAAGGTG AGCATAGCGCTGAGC CGGTCGCCTCGCTAT GGGAGTAGCAGGTGC 60
M M K K V S I A L S R S P R Y G S S R C 20
GGGAGTGCCAACGGC GAGGTGGTCTGGGG TCGTCCTCGGCCACC ACGACCCTCGCCACC 120
G S A N G E V V L G S S S A T T T L A T 40
ACCACCTCCTCGACC TCTTCCTCTTCTGCC TCTTCCTCCTCGCAG CACGACGCCGACAAG 180
T T S S T S S S A S S S Q H D A D K 60
AAGAAAAAGTCGAGA GCCGGCGGGATCCTG CAGACTTTGAGGAAG AAGATCAGCGACAAG 240
K K K S R A G G I L Q T L R K K I S D K 80
CTGGACACTCTCCAG CAGGGCAGCTCGAGT TCGACCTCGTCTCG CGGGCCGCCCCAGG 300
L D T L Q Q G S S S S T S S R A A P R 100
AAGAGCAAAAAGCGTC GAGGGCCTCTCCAAC AGCTTCGGCGGGGAC TCGTTCTCACAGTCG 360
K S K S V E G L S N S F G G D S F S Q S 120
GTGAGTGAGGAGTCC TCTAGTGATGGCCTC AACGCCTCTGGGGGC GGGGGAAGTGGGGGC 420
V S E E S S S D G L N A S G G G G S G G 140
ACACACAAAAAGCAAA ATAGCAAGCGTGCC ATCAGGCCTATCAAC ACTCCCATCAACACG 480
T H K S K H S K R A I R P I N T P I N T 160
CCCATTTGACGCGCAA AACTCATCATCACAT GTGTTGGCAGCCAAT GGCGACGTGGACACA 540
P I A R Q N S S S H V L A A N G D V D T 180
CAAGGGGGCAAGGTC GAAGSTGGCCAGGGC ATCACGGCAGCAGTG TCTCTTTATAGCAAG 600
Q G G K V E G G Q G I T A A V S L Y S K 200
CCTAAAGGTTACATA TCAGATGCATCAGTG CAGAAACAGCAGCAG CAGGTGTTGACTGAA 660
P K G Y I S D A S V Q K Q Q Q Q V L T E 220
GGCCAGGTGCCCAGG GCCAATGGCCGGGAT AAAGTGCCGACAGTG ACAGTGATAGTGTT 720
G Q V P R A N G R D K V P T V T V D S V 240
GGGGGGGTCGAGGAG TGTGTGTACACCAGT GCCAATGTCCCTAGA AGGGGCCTTGGTGTT 780
G G V E E C V Y T S A N V P R R G L G V 260
GCCAAGAATGCTGAC CACAGTGCCATATCG GAGACGTCATCACCA CAGCCCAACCGGACG 840
A K N A D H S A I S E T S S P Q P N R T 280
TGTGGATGCGAGCTG TGGGACCTTCAGGAC ATGAGTCTAGATGCC AGTAAGAGGAGCCTG 900
C G C E L W D L Q D M S L D A S K R S L 300
GCAGAAGAGCTTTTC CATCTGGCAAAGTAC GGATGGTACTGGGGA CCAATCACACGTGCC 960
A E E L F H L A K Y G W Y W G P I T R A 320
GAGGCTGAGGAAAAG CTCTTTTGACCAGCCT GATGGAGCTTTCTCTC GTTCGAGATTCTCT 1020
E A E E K L F D Q P D G A F L V R D S S 340
GACGACAAGTACCTG CTGAGCCTAAGCTTC CGATCGTTCAACAGG ACGTACACACACGC 1080
D D K Y L L S L S F R S F N R T L H T R 360
ATTGAACACAGCAAT GGCTGGTTCAGTTTT TACCCGCATCCAGAA CACGAGGGCCACACC 1140
I E H S N G W F S F Y P H P E H E G H T 380
AGCCTTGTGGGGGTG ATTGACCACAGCATG AGCCACTCTGAGTCA GGTGTCTTCTGCTAT 1200
S L V G L I D H S M S H S E S G V F C Y 400
TCCCGAGCCCGTGGG CCTGGGTCTCCATCC TTCCCTGTGAGGCTC ACCAAGCCAGTCTCC 1260
S R A R G P G S P S F P V R L T K P V S 420
AGTTTACTCAGGTG CGATCCCTACAATAC CTTTGCCGATTGTG ATCAGACAGTACACT 1320
R F T Q V R S L Q Y L C R F V I R Q Y T 440
CGTGTGGACACATA CAGGCTTTGCCGCTG CCAACCAGGATAAAG GGATATCTTGAAGAA 1380
R V D H I Q A L P L P T R I K G Y L E E 460
GGTCACTAC TGA 1392
G H Y * 463

```

**Figure S1:** The LvSOCS6 protein coding nucleotide region (top) and its deduced amino acid sequence (bottom). The start (ATG) and stop (TGA) codons are presented in red color. In the amino acid sequence, SH2 and SOCS-box domain positions are shown in red and blue color boxes.

**ATG**GCCAGAGAGGGT TGTGTGTGGATTGAT AAGTTTGCCTCATTG TTTGTGAAACAAGTG 60  
 M A R E G C V W I D K F A S L F V K Q V 20  
 CTTGAGGAGGCACTG ACTGTGAGTTGTTCA ATAGGATGGTCCATC AAATGTTCTGGCCAG 120  
 L E E A L T V S C S I G W S I K C S G Q 40  
 TGTGAGCGGGAACAG TGTCCGGAGGAGTAC CAGAGGAAGGAGAGC AACTGGTGGGCTGTA 180  
 C Q R E Q C R E E Y Q R K E S N W W A V 60  
 GGTGGGAGCAAAGGG AGTCGCAAGTCAAGC ATTCCCTCCTTGGC CTGTCTGTGGGAGC 240  
 G G S K G S R K S S I P L L G L S C G S 80  
 CCAGGCTTGTGCTGG ACGCCAGAGCTACCC TACAGCCCCTCGCAC CGGCCGCACTCCCGA 300  
 P G L C W T P E L P Y S P S H R P H S R 100  
 TCTTCCTTGGGCTCA AGTCTCTCCTTCTCC CATGACTCATTTGGTC AGCTCTGGCCCTCGC 360  
 S S L G S S L S F S H D S L V S S G P R 120  
 ATGGATGACTCCAC CTCATCACCGCGCT GTGTACATGATGCC TTGCTCTTTCCTACT 420  
 M D D S H L I T G A V S H D A L L F P T 140  
 TCCAAACCAACAC AGCGATGTAAGTGAC ATTTACAACGTGCCG CTAGATGGAGATATC 480  
 S K T N H S K D V S D I Y N V P L D G D I 160  
 TATGCATGCCAGTA GATGTAGTGAAGCCG AAGGAAGGGCAGATA CTACACCCAAAGGCC 540  
 Y A V P V D V V K P K E G Q I L H P K A 180  
 ATTATGCACAGCCC AAGAAGAGACATCAC CGGAGACATGGTAAG AACAGTGCCAGTGCC 600  
 I M H Q P K T H R R R H G K N S A S A 200  
 AGTGTGCTGAATGAT GCCAGTTCCAAGAGA GTGAGTAGTTCCGAT CACGTTAGCAGTAGC 660  
 S V L N D A S S K R V S S S D H V S S S 220  
 CGGCAGCTCAAGGAG AGTAGTGTGACGAGG AGCAGACAGCACTCA GGTCAATCTGTGCA 720  
 R Q L K E S S V T R S R Q H S G Q S V A 240  
 TCAGTCAGTGGTGGT GAATTGTTAAGGGTC AGCAAGCGTCACAGT GTCCCCAGTAACATT 780  
 S V S G G E L L R V S K R H S V P S N I 260  
 GGTTGTGCCCTCAGC ATGACTCCAAGCAT GGCCCCAGCAAAGAA AATCATGAACCCATT 840  
 G C A L S M T P K H G P S K E N H E P I 280  
 CACATGACGTTAGAG GAAGTTAGAAAGTCC TTCCACGAGTCTGAT GACACAATAAACTGT 900  
 H M T L E E V R K S F H E S D D T I N C 300  
 AACAAGACTCATAGA GTTCAACAAGAGAGA AAAGTAGCTCATGAA CAATCTAAATATGC 960  
 N K T H R N Q Q E R K V A H E Q S K I C 320  
 AGAATAATTCCATTT ACTTCAATGAAGTCA TGCAAAAGAAAAGAC AGCTCTGAAGGGCGT 1020  
 R I I P F T S M K S C K R K D S S E G R 340  
 CTTGAGGACAACAGA AAGAAAGGCAAAAGT ATATCTAGTAATATC CGTAACACCCTTATT 1080  
 L E D N R K K G K S I S S N I R N T L I 360  
 ACAATATTTGGTCTG AAAAAGGGAACCAA TCTAGTAGTTCAAGA TTGAAAAGCGGAAGC 1140  
 T I F G L K K G T K S S S S R L K S G S 380  
 TGTGTGGACGCTGCA TCTCAGGGATTTTCA GAAATCGCCGGCAAT GGGACCACAACCCGT 1200  
 C V D A A S Q G F S E I A G N G T T T L 400  
 GCTGGCTCCCCGCC TCAGGACCAAAACCC AACAATACAGCCAAC CATACAACCACCGTT 1260  
 A G S P A S G P K P N N T A N H T T T V 420  
 AGCAAGAACCACCAC AACCAGCAGAACCAT CACAGCAACCACCGC CACTCCAATGGCATT 1320  
 S K N H H N Q Q N H H S N H R H S N G I 440  
 AACACTGGATTGCTG TCATGCCTGGGAAAC CACAGAGCAGAGGCA GATGACCTACCTGCG 1380  
 N T G L L S C L G N H R A E A D D L P A 460  
 ACTGTAGCCCCAGCA CCTCAGCAGAACAGC GCTCCCCATCACGA TCACCAGCTATTGTC 1440  
 T V A P A P Q Q N S A P P S R S P A I V 480  
 ACCAACCGTGCACTG CCTCCTTTGCCCTTG CCCAGTACCGGGGAG GAGGAAGATGCCAAC 1500  
 T N R A L P P L P L P S T G E E E D A N 500  
 AGTAAGTCGCAGACA GAGTCTGGGAGTGAG CGCAGAGAAGAGGAA GGCTGCGACTTTGCC 1560  
 S K S Q T E S G S E R R E E E G C D F **A** 520  
 TCCATCATTGAAAA GTCAAAGATTGTGGG TGGTATTGGGGTCCA ATCAGCGGGGAGGCA 1620  
 S I I E K V K D C G W Y W G P I S G E A 540  
 GCGGAGAAGGTGCTG GCCAACGAACCCGAT GGGTCCTTCATTGTG AGGGATTGCTCTGAC 1680  
 A E K V L A N E P D G S F I V R D S S D 560

```

CACCCTACATCTTC TCCCTTACCTTCAAG CTCATGGCTTCATT CGGCACGTCAGGATT 1740
H H Y I F S L T F K L N G F I R H V R I 580
GAACATGATCAAGGA AATTTCAGTTTGGT GGGTTTACCAAGTTC AAAAGCCAGACCATA 1800
E H D Q G N F S F G G F T K F K S Q T I 600
GTCGAGTTCATGAA AATGCTGTGAACAT TCTCGTAGCGGCCGA TATTTGTTTTCTCG 1860
V E F I E N A V E H S R S G R Y L E F L 620
CACCGTCGCCCTGTC CTGGGACCCATGAGG GTTCAGCTTCTCCAC CCAGTGTCTCGCTTT 1920
H R R P V L G P M R V Q L L H P V S R F 640
AAGCACATTCAGAGT CTTCAGCATTGTGT CGATTGTATTGTG AAGCATGTCCGCCGT 1980
K H I Q S L Q H L C R F V I V K H V R R 660
GACCTGATTGGTGAG CTGCCACTACCTCAG CGACTGAAAGACTAT TTGTGCTCCCCGCAT 2040
D L I G E L P L P Q R L K D Y L C S P H 680
TACTATCCGAAATG GTTGAGCAATGCATG GCAGCCGCTGCGGCC GCTGCAGCTTCTGAT 2100
Y Y S E M V E Q C M A A A A A A A A A S D 700
AATGAAGACAGTGT TCCTCAGGAGCCACA GTCGAAGGGCTTAGT GTTCCTAGTCAGGTG 2160
N E D S A S S G A T V E G L S V P S Q V 720
CTTCAACCCCTCGCTA GGAGACCTACAAGAC AACCTTCCTGCACCA CCCACCCCTTTGCCA 2220
L H P S L G D L Q D N L P A P P T L L P 740
GGCTTCCCCGGTGTA CCTCAGCCTGTGATG GACCGTGCCTCCAG ACCTCCCAGGCGGCT 2280
G F P G V P Q P V M D R A S Q T S Q A A 760
TCCCCCAACCCACCA CCGTCACAGGAGGAC GACCTGAACCTCCAA GCTCACCAGGATTTA 2340
S P N P P P S Q E D D L N L Q A H Q D L 780
GATAATTCCAATCTA CAAGAGACCAGCCCA AACCAACAACATCC ACTGTACTTCAACCC 2400
D N S N L Q E T S P N H N T S T V L Q P 800
CTAATAGACCCGAC CATCATGTGCAGT ATAACACAGCCTTTG CCAGAGCCCAACCAC 2460
L I D P D H H V S S I T Q P L P E P N H 820
CTCACCATGAACCCC CCAGCCAGTGTAAC GACGACTCCACCATC AGTCACTCCCCTACA 2520
L T M N P P A S V N D D S T I S H S P T 840
TGTTGCTCACCCGCA CACATGGAGCGTGAT AATTACCGTGTGTGC CCACAGGTGACCCTA 2580
C C S P A H M E R D N Y R V C P Q V T L 860
ACCAGCCAGGCTCAT GCTGCCAGTGCCTCA CCTGCCCTACAGGGT AACCTTGCCTTCGCC 2640
T S Q A H A A S A S P A L Q G N L A F A 880
CACCAACACACGACC AGTGCCAGTGGGCCT CTCTCACTCGTCTCC TCAAAGAGTGACGCG 2700
H Q H T T S A S G P L S L V S S K S D A 900
CAGGACGATAGAAGT TTCCCTATTGACAGA GCACCCATGTTCACT GACAGTGCTCGCAGT 2760
Q D D R S F P I D R A P M F T D S A R S 920
GATGCAGGCAGAATA AAAGCGAATGCAATG GGCTCTGGAGACTTT GTTAGAATCAACCCA 2820
D A G R I K A N A M G S G D F V R I N P 940
TGTCGTGGTCTGGAT GACCATGTTTTTGAA GATTAGGAGGTGTC TGA 2868
C R G L D D H V F E D L G G V * 955

```

**Figure S2:** The LvSOCS7 protein coding nucleotide region (top) and its deduced amino acid sequence (bottom). The start (ATG) and stop (TGA) codons are presented in red color. In the amino acid sequence, SH2 and SOCS-box domain positions are shown in red and blue color boxes.



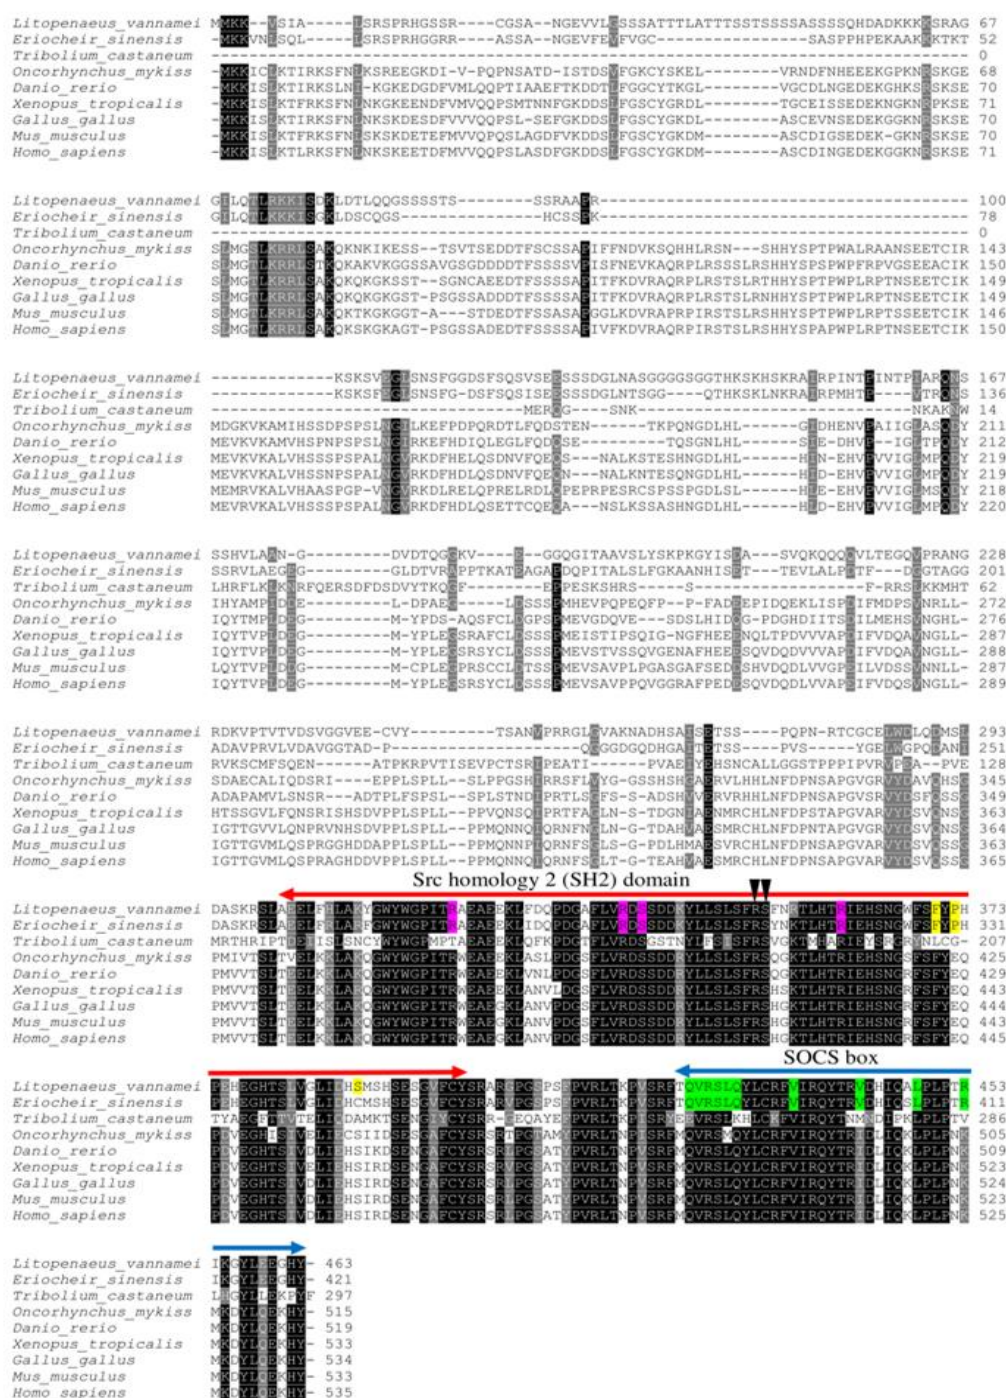

**Figure S3:** Multiple sequence alignment (MSA) of LvSOCS6 and its counterparts. Strongly conserved and similar residues are highlighted by black and gray shading and the conserved phosphotyrosine recognition site (pY) of LvSOCS6 is indicated with (▼). The regions of the phosphotyrosine binding pocket, hydrophobic binding pocket, and putative elongin B/C binding pockets are indicated in purple, yellow, and green color respectively. The species and the GenBank accession numbers used for the MSA were as follows: SOCS6 from *H. sapiens* (NP\_004223.2), *M. musculus* (NP\_061291.2), *G. gallus* (NP\_001120784.1), *X. tropicalis* (NP\_001096240.1), *D. rerio* (XP\_687041.2), *O. mykiss* (NP\_001182102.1), *E. sinensis* (ATW63847.1) and *T. castaneum* (XP\_008190646).

|                             |                                                                                     |     |
|-----------------------------|-------------------------------------------------------------------------------------|-----|
| <i>Litopenaeus vannamei</i> | -----                                                                               | 0   |
| <i>Chionoecetes opilio</i>  | MIVVLRCRQVVMATAAGLARQRWVRCAAEEVKMEGPDSPQPPQISSPLPPPIIAEEAPHQSPSPPPQTSPTSPLQSLPHTPLR | 80  |
| <i>Zeugodacus cucurbita</i> | -----MLEMDTVIRDEDSNY-----                                                           | 15  |
| <i>Ceratitidis capitata</i> | -----MLEMDTTSKDEDSNC-----                                                           | 15  |
| <i>Oncorhynchus mykiss</i>  | -----                                                                               | 0   |
| <i>Danio rerio</i>          | -----                                                                               | 0   |
| <i>Xenopus tropicalis</i>   | -----                                                                               | 0   |
| <i>Gallus gallus</i>        | -----                                                                               | 0   |
| <i>Mus musculus</i>         | -----                                                                               | 0   |
| <i>Homo sapiens</i>         | -----                                                                               | 0   |
| <i>Litopenaeus vannamei</i> | -----                                                                               | 0   |
| <i>Chionoecetes opilio</i>  | HSPLPHTPITPHTPLPHTPLTPHSPLTPLTSQSTLASEASVDSGVASAHSLDMLHNSCSSFETHALRRRAGSSVSSGTSE    | 160 |
| <i>Zeugodacus cucurbita</i> | -----NMATS-ASNNSAVSTILQMCQSTCTDY-----                                               | 42  |
| <i>Ceratitidis capitata</i> | -----NFSTP-SFANSSAVSSILQMCQSSCSDY-----                                              | 42  |
| <i>Oncorhynchus mykiss</i>  | -----                                                                               | 0   |
| <i>Danio rerio</i>          | -----                                                                               | 0   |
| <i>Xenopus tropicalis</i>   | -----                                                                               | 0   |
| <i>Gallus gallus</i>        | -----MQRAELRD--GEAA-----                                                            | 12  |
| <i>Mus musculus</i>         | -----                                                                               | 0   |
| <i>Homo sapiens</i>         | -----                                                                               | 0   |
| <i>Litopenaeus vannamei</i> | -----                                                                               | 0   |
| <i>Chionoecetes opilio</i>  | GWLGSLDGDGPAGLEVLPELWPHSESPTAPGHSLPPSHNSPASPKHSTPTSHRSPTLSCHSPVTMHHSPTTTTATTTTTTT   | 240 |
| <i>Zeugodacus cucurbita</i> | --VGVLPPPHIDMVSVNSVELNAQTSLSDDSGVPLTTNSSISSG-----DSYRMGLCKHEIDIVESDGE-----          | 104 |
| <i>Ceratitidis capitata</i> | --VGVLPPP-IDMASVNSVELNAQTSLSDDSGVPLTTNSSISSG-----DSYRMGLCKHEIDIVESDGE-----          | 103 |
| <i>Oncorhynchus mykiss</i>  | -----                                                                               | 0   |
| <i>Danio rerio</i>          | -----                                                                               | 0   |
| <i>Xenopus tropicalis</i>   | -----                                                                               | 0   |
| <i>Gallus gallus</i>        | -----AAASYRVLSRLLGYGAGPEAGAA-----                                                   | 35  |
| <i>Mus musculus</i>         | -----                                                                               | 0   |
| <i>Homo sapiens</i>         | -----                                                                               | 0   |
| <i>Litopenaeus vannamei</i> | -----                                                                               | 0   |
| <i>Chionoecetes opilio</i>  | TATTQNLHPPSSEAAISKAIVPGDSQDPERHSSSPRDNPKAEFSTVIPIHPSALSPTSPPLRPG--VVQTGKKRQNFMI     | 317 |
| <i>Zeugodacus cucurbita</i> | -VSQFDSLDCNSEAGMS-----AENFNTLK--KGPLAPIDPPELFQDSPNITIGRCIMQKLR                      | 158 |
| <i>Ceratitidis capitata</i> | -VSQFDSLDCNSEAGMS-----AENFNTLK--KGPLAPIDPPELFQDSPNITMGRICIKQKLR                     | 157 |
| <i>Oncorhynchus mykiss</i>  | -----MV-----                                                                        | 2   |
| <i>Danio rerio</i>          | -----                                                                               | 0   |
| <i>Xenopus tropicalis</i>   | -----MV-----                                                                        | 2   |
| <i>Gallus gallus</i>        | -----GGPGSGAAVAGPPGPGGAR-----L--PLPVPA--PGGAP-----RPPQQLMV                          | 74  |
| <i>Mus musculus</i>         | -----MV-----                                                                        | 2   |
| <i>Homo sapiens</i>         | -----MV-----                                                                        | 2   |
| <i>Litopenaeus vannamei</i> | -----                                                                               | 0   |
| <i>Chionoecetes opilio</i>  | TVNSAP-----ITESQCGHVFTEYGC-----SGDEGYENRFCFTKDHLLQENCGLNGVLRKTKTAH                  | 375 |
| <i>Zeugodacus cucurbita</i> | RLSSSHSSLEHSDKDEHNENSINGDRIFCKSDDEDVSSQYLAKSHKEVLIKKPIYSSDSILNSKAEN-----            | 226 |
| <i>Ceratitidis capitata</i> | RLSSSHSSLEYSKESEYNNENNTHGEKTCCKEADMEITTYLQKPHKELYLMKKPIYSSDSILNTNKEN-----           | 225 |
| <i>Oncorhynchus mykiss</i>  | FQNLRL--TSDGVFECGL-----QQPPGFQVSEV--DKQEASSVCVMMT-----                              | 42  |
| <i>Danio rerio</i>          | -----                                                                               | 0   |
| <i>Xenopus tropicalis</i>   | FRNMLR--GEEEGGEAAP-----EP-----                                                      | 20  |
| <i>Gallus gallus</i>        | FRNAAE--GRPGEEEA--GG-----                                                           | 92  |
| <i>Mus musculus</i>         | FRNVGR--PPEEEDAEA-----                                                              | 17  |
| <i>Homo sapiens</i>         | FRNVGR--PPEEEDVEA-----                                                              | 17  |
| <i>Litopenaeus vannamei</i> | -----MAREGCVMWDKFFASLFVKQVLEEALTVSC-SIGWSIKCSGQCQREQCREEY-----                      | 50  |
| <i>Chionoecetes opilio</i>  | HLATFSEANQIARECIWIDKFASLFVKHIIIEALSVSS-CRGWSIKCSGQCQREQCRQEY-----                   | 434 |
| <i>Zeugodacus cucurbita</i> | --VYDEP--SNLICNYAFNNAETESNTSSNVLLLPQASHPPDKVKRDMCPYYQEHSMYFKAIPSDQDSVISAVKKFNT      | 301 |
| <i>Ceratitidis capitata</i> | --VYDEP--NNVICNYALTNTVEFQHTNSISLSLPQTSPPERAKRDLCPPYEDHSMYFKAIPSEQDSIMS-TAKFNT       | 299 |
| <i>Oncorhynchus mykiss</i>  | ---SDNNMDVQHQRLOQWHPIMKL--SK-----VVTD-AGDLAGEGDGLCHRRHLVTDAMDWPPL-----              | 95  |
| <i>Danio rerio</i>          | -----MTVQ-----                                                                      | 4   |
| <i>Xenopus tropicalis</i>   | -----EAL--VE-----A-LP-AEG-SPQSAELCNRRHRKAAQ-----                                    | 47  |
| <i>Gallus gallus</i>        | -----GEGPAGGPELLCPRHRCALEPKAAA-----                                                 | 117 |
| <i>Mus musculus</i>         | -----AREPGPSELLCPRHRCALDPKALPPG-----                                                | 43  |
| <i>Homo sapiens</i>         | -----APEPGPSELLCPRHRCALDPKALPPG-----                                                | 43  |
| <i>Litopenaeus vannamei</i> | -----QRKESNWWAVGGSKGSRKSSI-----PLLGL-SCGSPGLCWTPEL--PYSPSH                          | 95  |
| <i>Chionoecetes opilio</i>  | -----QKENTLWSVGGGKGNRKSSI-----PILGL-SCGSPGLCWTPEL--PYSPSH                           | 479 |
| <i>Zeugodacus cucurbita</i> | FGLSEIHDYDLYYGIKRNTFQGEN-----SLQKKVL-----YSPRKVTNYCHSHHIYTGPNCGTN                   | 356 |
| <i>Ceratitidis capitata</i> | YGLSEIHDYDLYYGIKRNAVQCEN-----GLQKKVL-----YSPRKVTNYCHSHHIYAGPNNGSN                   | 354 |
| <i>Oncorhynchus mykiss</i>  | -----LDKSLCFDILDPRKTCSTGDTNYHHHLDVTNLNARRLGELGQAS--EMLLKERGEMTRGSCQSI--LA----       | 160 |
| <i>Danio rerio</i>          | -----RQLQ-----LPEGFVLELARKFGEIGVAPVPEFLL-KDGELOHSCQSV-----                          | 47  |
| <i>Xenopus tropicalis</i>   | -----PGLGLELQLGALGLRG-----AGGPC-----                                                | 68  |
| <i>Gallus gallus</i>        | -----G-----GGWGPPGGLLEQLAALGLRPPA--L-GAKGPAAQPCIGP--PA----                          | 156 |
| <i>Mus musculus</i>         | -----LAL-----RTWGPVAGLEAQLAALGLGQAPAGPI-KTAGGGCCPCPCP--PQPPPP                       | 92  |
| <i>Homo sapiens</i>         | -----LAL-----RTWGPAAGLEAQLAALGLGQAPAGPV-KTVGGGCCPCPCP--PQPPPP                       | 92  |

*Litopenaeus vannamei* RPHSRSSLGSSLSFSHDSLVLS-SGPRMDDSHLITGAVSHDALLFPTSKTNH-SDVSDIYNVPLGDIY--AVPVDV--- 167  
*Chionoecetes opilio* RPHSRSSLGSSLSFSHDSLVLS-SGPRMDDSHLITGAVSHDALLFPTSKASHSDVGEIYHVPLGDIY--AVPVDV--- 552  
*Zeugodacus cucurbita* RPNRSRNLNSRLSSSHNSLSTSSANKPDDSIPTQAMSHDALLT-----REISDFYNVPIGSDIY--ALPIDMIKTD 426  
*Ceratitis capitata* RPNRSRNLNSRLSSSHNSLSTSSANKPDDSIPTQAMSHDALLT-----REISDFYNVPIGSDIY--ALPIDMIQTD 424  
*Oncorhynchus mykiss* ---SAT-----GGMGPGED---PSEUSDALLVLEGLDS--EEVGE---LGMGGEFCKGVPQGEGETD 212  
*Danio rerio* ---LGS-----AGMRQGED---PTEUSDALLVLEGLGS--EEVNG---LGINACQK-----PE 89  
*Xenopus tropicalis* -----EETSDALLVLEAPEA--R-----RLGEQEE-----GE 93  
*Gallus gallus* -----AEETSDALLVLEALEP--D-----EASCSCE-----EE 182  
*Mus musculus* QPPPPA-----AAPQAGED---PTEUSDALLVLEGLGS--EA-ES---LETNSCSE-----EE 136  
*Homo sapiens* QPPPPA-----AAPQAGED---PTEUSDALLVLEGLGS--EA-ES---LETNSCSE-----EE 136

*Litopenaeus vannamei* -VKPK---EGQILH--PKAIMHQPKKRHHRRHGKNSA--SASVLNDASSKRVSSSDHVSSRQLKESSVTRSRQHSQGQSV 239  
*Chionoecetes opilio* -VKPK---EGQIILH--PKAIMHHPKKRHHRRHKPTSPIVSATLLHDSNSKKVSSFDVPLSTRPVKDGSVSRSRQHSQGQSV 626  
*Zeugodacus cucurbita* KSSLVEYKDKDLTD--YRKIN-----HLILTEENYCKHSLSRKNNRNRKKK---RNSDTYENDI 481  
*Ceratitis capitata* KNCRLYEKEDIKD--YKILN-----NLLLTDDDYSKHSLNRKNNRNRKKK---RNSETYESDV 479  
*Oncorhynchus mykiss* TGQDR--RGAFSSGSLTGLMRQV-HRLAGEVRACGPQVCP-----SPLDSLGSAAALTSSSLSLASNTTGQOV 277  
*Danio rerio* SQTTE---PGAFALKCFPSVLSGQAMGVSG--GLCSPTCCL-----LR---DSVNNRPQA--PAAD-----K 141  
*Xenopus tropicalis* AA-----QAP-----QAP----- 99  
*Gallus gallus* PGSPG---PAD-----PQEP--R----- 196  
*Mus musculus* LSSPG---RGG-----GGVGG-RLL-----LQ---PPGPELPPVPFPLQD-----L 170  
*Homo sapiens* LSSPG---RGG-----GG-GG-RLL-----LQ---PPGPELPPVPFPLQD-----L 169

*Litopenaeus vannamei* -A---SVSGGELLRVSK--RHSVPSNIGCALSMTPKHGSPKENHEPIHMTLEEVRKSFHESDDTINCNKTRHVQQRKV 312  
*Chionoecetes opilio* -T---SVS-GDLLKASK--RHSVPSNIGCALSMTPKHNSSKENHEPIHMTLEEVRKSFHESDDTINCNSNRDQESNKG 698  
*Zeugodacus cucurbita* KYDNYKFTSNAFKLKKNKTTILNETEDYGSHTSNTQLDL-NEPQERLHMTLSEVKYQTIYTKTK-NRTNINN--- 554  
*Ceratitis capitata* KCDNYKFATNALKLKKNKADTLNESEDYGLHTSAHTLLNSSAPPQERLNMTLNEVKYQTIYTRTK-NRSSIQN--- 553  
*Oncorhynchus mykiss* -VEASATLSGTLPSKDP--S-QTSQSLPQSRAATPKLGVMLRAASPLVV----- 323  
*Danio rerio* -L-IPEVISQAEPSQETP--C-SS-----QASTPKARSSSRAHLS--A----- 177  
*Xenopus tropicalis* ----- 99  
*Gallus gallus* -----GAAAAA---RR-----A----- 206  
*Mus musculus* -V-PPGRLSRGEQQQ---Q-----QPPPP-----P-P----- 191  
*Homo sapiens* -V-PLGRLSRGEQQQ---Q---Q-----QPPPP-----P-P----- 193

*Litopenaeus vannamei* AHEQSKICRIIPFTAMKSCRRKDSSEGRLEDNRKKKRSISSNIENLTITIFGLKKGTKSSSSRLKSG-----SCVDAAS 386  
*Chionoecetes opilio* MNEHSKICRIIPFTAMKSCRRKDSSENRLDDNRKKRSISSNIENLTITIFGLKKGTKSSGTRLKSS-----NCVDAAS 772  
*Zeugodacus cucurbita* --ESDKT-----AFKKQSE-----YTKNDSSPRST-----NLCSIGENVSTECKVTTR 597  
*Ceratitis capitata* --ESDKI-----DCVKPII-----ELGNDSSPCSR-----NQSSNEENNSAECKTNIR 596  
*Oncorhynchus mykiss* -----EGAAGGE--KTTRKSRKGSGLIRLSKLFRTKSSSGSRHLDK---RPSLASSTSG 375  
*Danio rerio* -----ASGEKT--LKVPKSRKGSGLIRLSKLFRTKSCSGSNLLDK---RPSVTFISSA 229  
*Xenopus tropicalis* -----SRRLQNRKASLRNLSRIFRTKSCAGPPGTAERELGGSGG----- 139  
*Gallus gallus* -----VP-----GPGAGGRKGSGLRRLSRLFRTKSCSGSAPGDDGGSGRRGAE-LTASA 256  
*Mus musculus* -----PP--GPL--RPLAGPSRKGSFIRLSRLFRTKSCNGSGGGDGTG-KRPSGD-LAASA 243  
*Homo sapiens* -----PP--GPL--RPLAGPSRKGSFIRLSRLFRTKSCNGSGGGDGTG-KRPSGE-LAASA 245

*Litopenaeus vannamei* QGFSEIAGNGTTLAGSPASGPKPNNTANHTTT-V-SKNHNNQNNHNSNHRHS--NGINTGLLSCLGN---HRA----- 453  
*Chionoecetes opilio* QGFSEVAGNGTATLVCSPSTSGPQHNTHTNPASNTVTRNHQNNQNNHNSNPRHS--NGINTGLLSCLGN---LRA----- 841  
*Zeugodacus cucurbita* TFKS-----YNNNDKINNINNINIVLANNYSITENQMIKADVDLSDSQVIRSEK 647  
*Ceratitis capitata* TSKS-----YNNNDKINNINNINIVLANNYSITENQMIKADVDLSDSQVIRNEK 646  
*Oncorhynchus mykiss* GSDQMDVWGSSTST--DQDTGSKLQHSRP-----CSAFSPVAF--GPFTDTFLR-----G----- 422  
*Danio rerio* GSLVDM--SGAIGG--EQDTSSQPLGTRA-----CSAFSAASF--TPFTGETVSLVDVDISQR----- 283  
*Xenopus tropicalis* -SLT---DMSRDR--EELGRKPRLTR-----CSAFSPVSF--SPFTGETVSLVDVDISQR----- 190  
*Gallus gallus* HSLSDG--GGARGR--GQEEGRKRLTRT-----CSAFSPVVF--SPFTGETVSLVDVDISQR----- 310  
*Mus musculus* ASLTDM--GGSAGR--ELDTGRKPRLTR-----CSAFSPVSF--SPFTGETVSLVDVDISQR----- 297  
*Homo sapiens* ASLTDM--GGSAGR--ELDAGRKPKLTR-----CSAFSPVSF--SPFTGETVSLVDVDISQR----- 299

*Litopenaeus vannamei* -----EADDLPATVAPAPQONSAPPSRSPAIVT-----NRALPPLPL--PSTGEE- 496  
*Chionoecetes opilio* -----ETDEQPVSTPSIPTQ--TVAPSRSPAIVT-----NRALPPLPL--PASPEN- 883  
*Zeugodacus cucurbita* KTQFSLNLKQKFCNIFRIRRTQPQCQNLPGTEQNNRNREKST-VE-----KHKKVQSRALPPLPKKTES----- 712  
*Ceratitis capitata* KTQFSLNLKQKFCNIFRIRRTQPQSQNTPEE--RTINERERST-VE-----KHKKVQSRALPPLPKKTES----- 709  
*Oncorhynchus mykiss* -----LPRPIP-----LP-----GD----- 432  
*Danio rerio* -----RNSPHPTPPP-----PPRSLSLDDAFFRALPHSAAS-PME-----NPA----- 322  
*Xenopus tropicalis* -----SSSTHPTPPP-----PPRSLSLDDIGGIQAPSVLVGPMGSSLSQSFPLPPPPPPHAP 244  
*Gallus gallus* -----LSSPHPTPPP-----PPRSLSLDDISGTLPTSVLVGMGSSLSQSFPLPPPPPPHAP 364  
*Mus musculus* -----LTSHPPTPPP-----PPRSLSLDDISGTLPTSVLVAFMGSSLSQSFPLPPPPPPHAP 351  
*Homo sapiens* -----LTSHPPTPPP-----PPRSLSLDDISGTLPTSVLVAFMGSSLSQSFPLPPPPPPHAP 353

*Litopenaeus vannamei* -----EDANSKQTESGSEEREEEGCDFASTIEKTKDYGWYWGPISEBAAEKVLANEPDGSFIVRDSDDHYI 564  
*Chionoecetes opilio* -----EDSPKTPDGEAAGEREEEGCDFASTIEKTKDYGWYWGPISEBAAEKVLANEPDGSFIVRDSDDHYI 951  
*Zeugodacus cucurbita* -----YIEQCKGNSTKKEARLQFTSSIEKTKDYGWYWGPISEBAAEKVLANEPDGSFIVRDSDDHYI 777  
*Ceratitis capitata* -----IMTQNKGSQKQEGRTLOFTSSIEKTKDYGWYWGPISEBAAEKVLANEPDGSFIVRDSDDHYI 774  
*Oncorhynchus mykiss* -----GQNQSRVDQRPMLCLPLSPDASSPATISREIEKCGWYWGPMNWDAAEMKIKAKPDGAFIVRDSDDHYI 501  
*Danio rerio* -----P-ARLAPPQVMCLPLRGADSSSTASIREIEKCGWYWGPMNWDAAEMKIKAKPDGAFIVRDSDDHYI 388  
*Xenopus tropicalis* EPLRLVPLRPTTECPVPLVQPLQCLPKQDPSSAASIREIEKCGWYWGPMNWDAAEMKIKAKPDGAFIVRDSDDHYI 324  
*Gallus gallus* DAFRVVPLRPTTEPAPIQPAHLQCLPLRPDSSSAASIREIEKCGWYWGPMNWDAAEMKIKAKPDGAFIVRDSDDHYI 444  
*Mus musculus* DAFPRIAPIRAESLHSQPPQHLQCLPLRPDSSSAASIREIEKCGWYWGPMNWDAAEMKIKAKPDGAFIVRDSDDHYI 431  
*Homo sapiens* DAFPRIAPIRAESLHSQPPQHLQCLPLRPDSSSAASIREIEKCGWYWGPMNWDAAEMKIKAKPDGAFIVRDSDDHYI 433



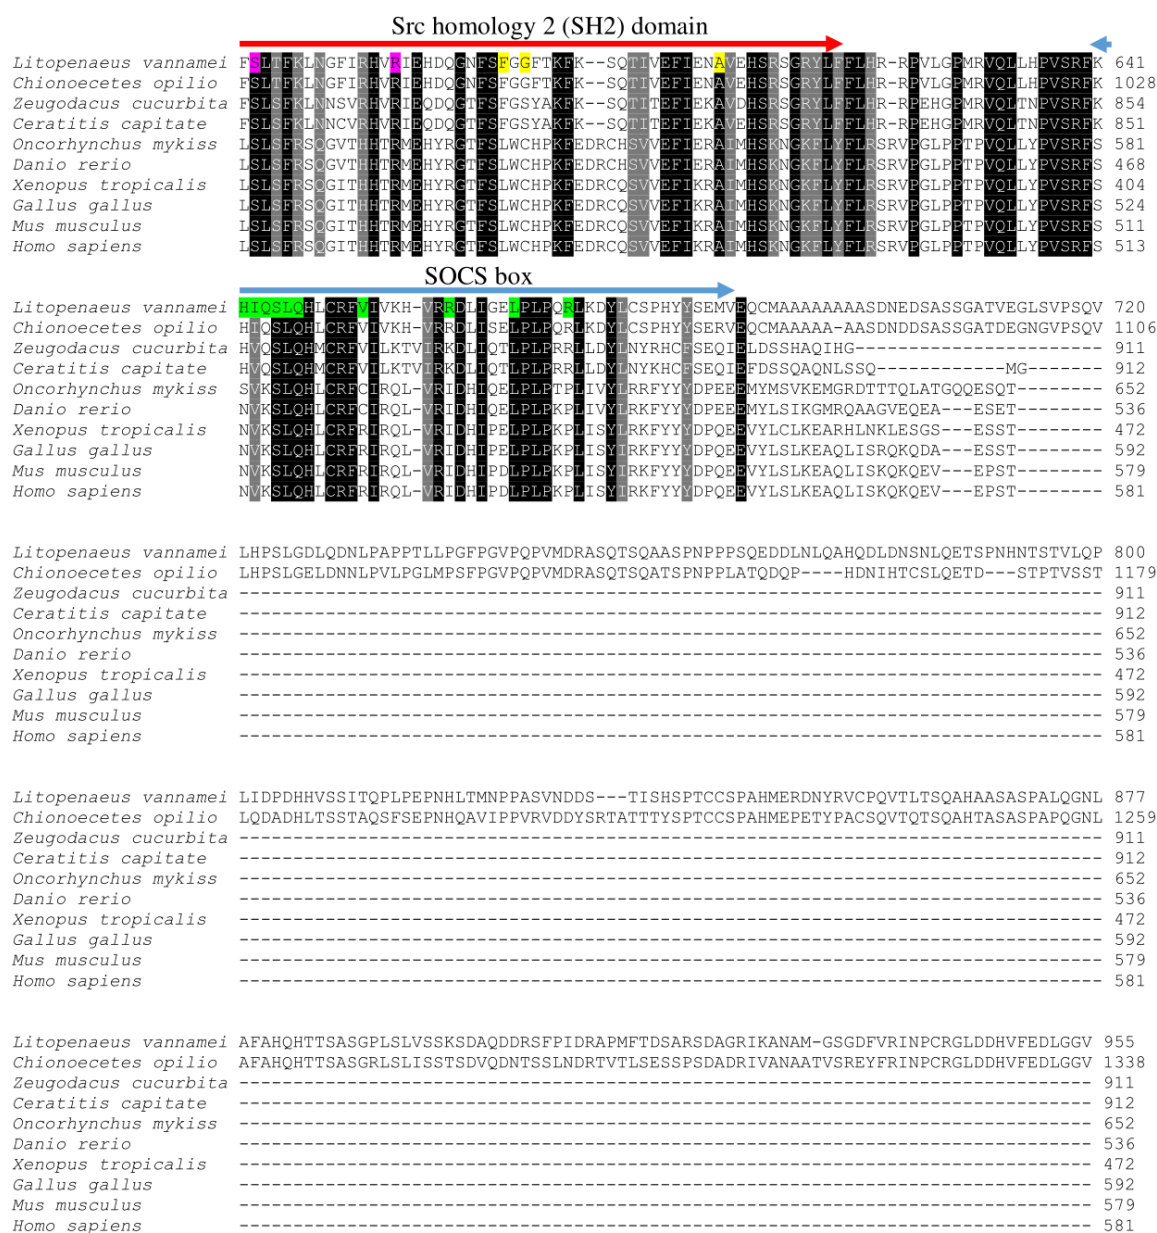

**Figure S4:** Multiple sequence alignment (MSA) of LvSOCS7 and its counterparts (Only the regions associated with SH2 and SOCS box are represented in the MSA analysis). Strongly conserved and similar residues are highlighted by black and gray shading and the regions of phosphotyrosine binding motif, hydrophobic binding motif, and putative elongin B/C binding motifs are indicated in purple, yellow, and green color respectively. The species and the GenBank accession numbers used for the MSA were as follows: *C. opilio* (KAG0725835.1), *Z. cucurbita* (JAD11819), *C. capitata* (JAC02138), *O. mykiss* (CAP17279.1), *D. rerio* (ABM68038.1), *X. tropicalis* (NP\_001121531.1), *G. gallus* (XP\_040509254.1), *M. musculus* (NP\_619598.1) and *H. sapiens* (NP\_055413.1).

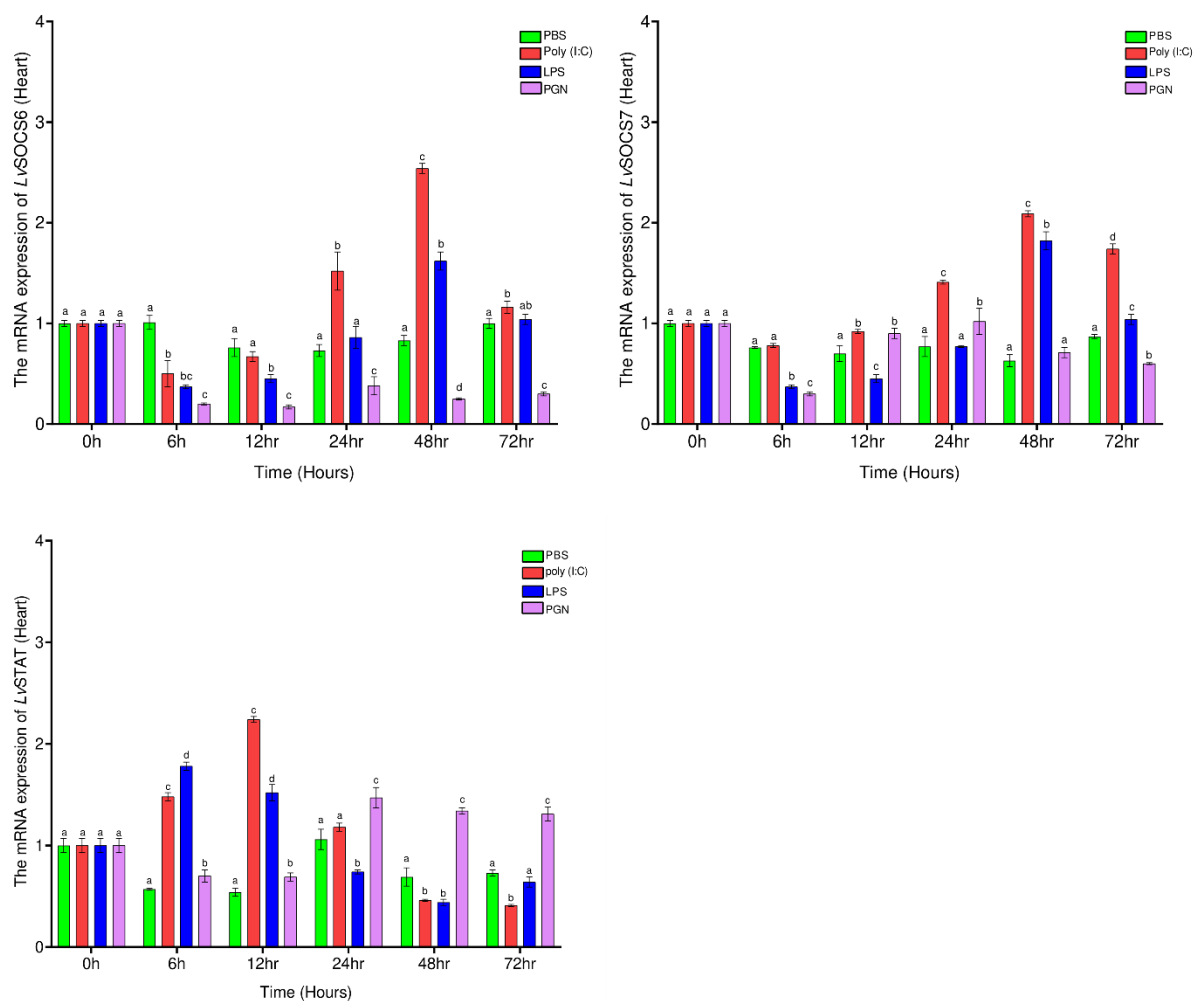

**Figure S5:** Temporal mRNA expression analysis of (A) LvSOCS6, (B) LvSOCS7, and (C) LvSTAT in heart tissue as determined by qPCR following stimulation of the immune response. Shrimps were challenged with LPS, poly (I:C), PGN, or phosphate-buffered saline (PBS), as a control. The expression of LvSOCS6 was normalized to EF1 $\alpha$  internal control gene. Results are represented as the mean  $\pm$  S.E (N= 3). Statistically significant values ( $P < 0.05$ ) are denoted with alphabets.
