# Supplementary material for: Molecular Cloning and Gene Expression of Type I Suppressor of Cytokine Signaling 6 and 7 (SOCS6 and SOCS7) in White Leg Shrimps (<em>Litopenaeus vannamei</em>)
Source: Preprints.org preprint supplement (doi:10.20944/preprints202307.2067.v1), 2023-07-31
Supplement: Supplementary file 2 [file supplementary]

Archive with 2 entries (2 files):
- Supplementary Material.docx.pdf
- Table S3- The qPCR expression dynamics.xlsx
